# Supplementary material
Source: Springer Nature journal article supplement (https://www.springermedizin.de/resource/supplementary/12889_2014_6793_MOESM2_ESM.pdf/9499046)
Supplement: MOESM2 [file 9499046]

**Fever or history of fever**

**N= 1,228**

Eligibility forms  
not completed  
n= 43

Eligibility forms  
completed  
n= 1,185

Not eligible for  
inclusion  
n= 482

Eligible for  
inclusion  
n= 703

Refused  
n= 2

Enrolled  
n= 701

**Dengue (-)**  
**n= 143**

**Dengue (+)**  
**n= 558**
